# Supplementary material for: Exploring adverse drug events at the class level
Source: PubMed Central journal article supplement (PMC4416343; doi:10.1186/s13326-015-0017-1), 2015-05-01
Supplement: 13326_2015_17_MOESM1_ESM.pdf [file 13326_2015_17_MOESM1_ESM.pdf]

Color Key (log(PRR))

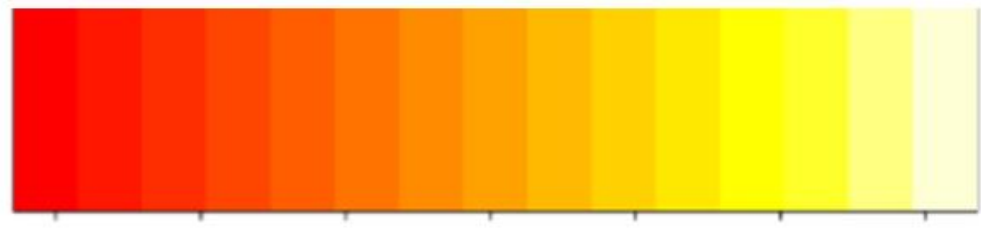

-4 -2 0 2 4 6 8

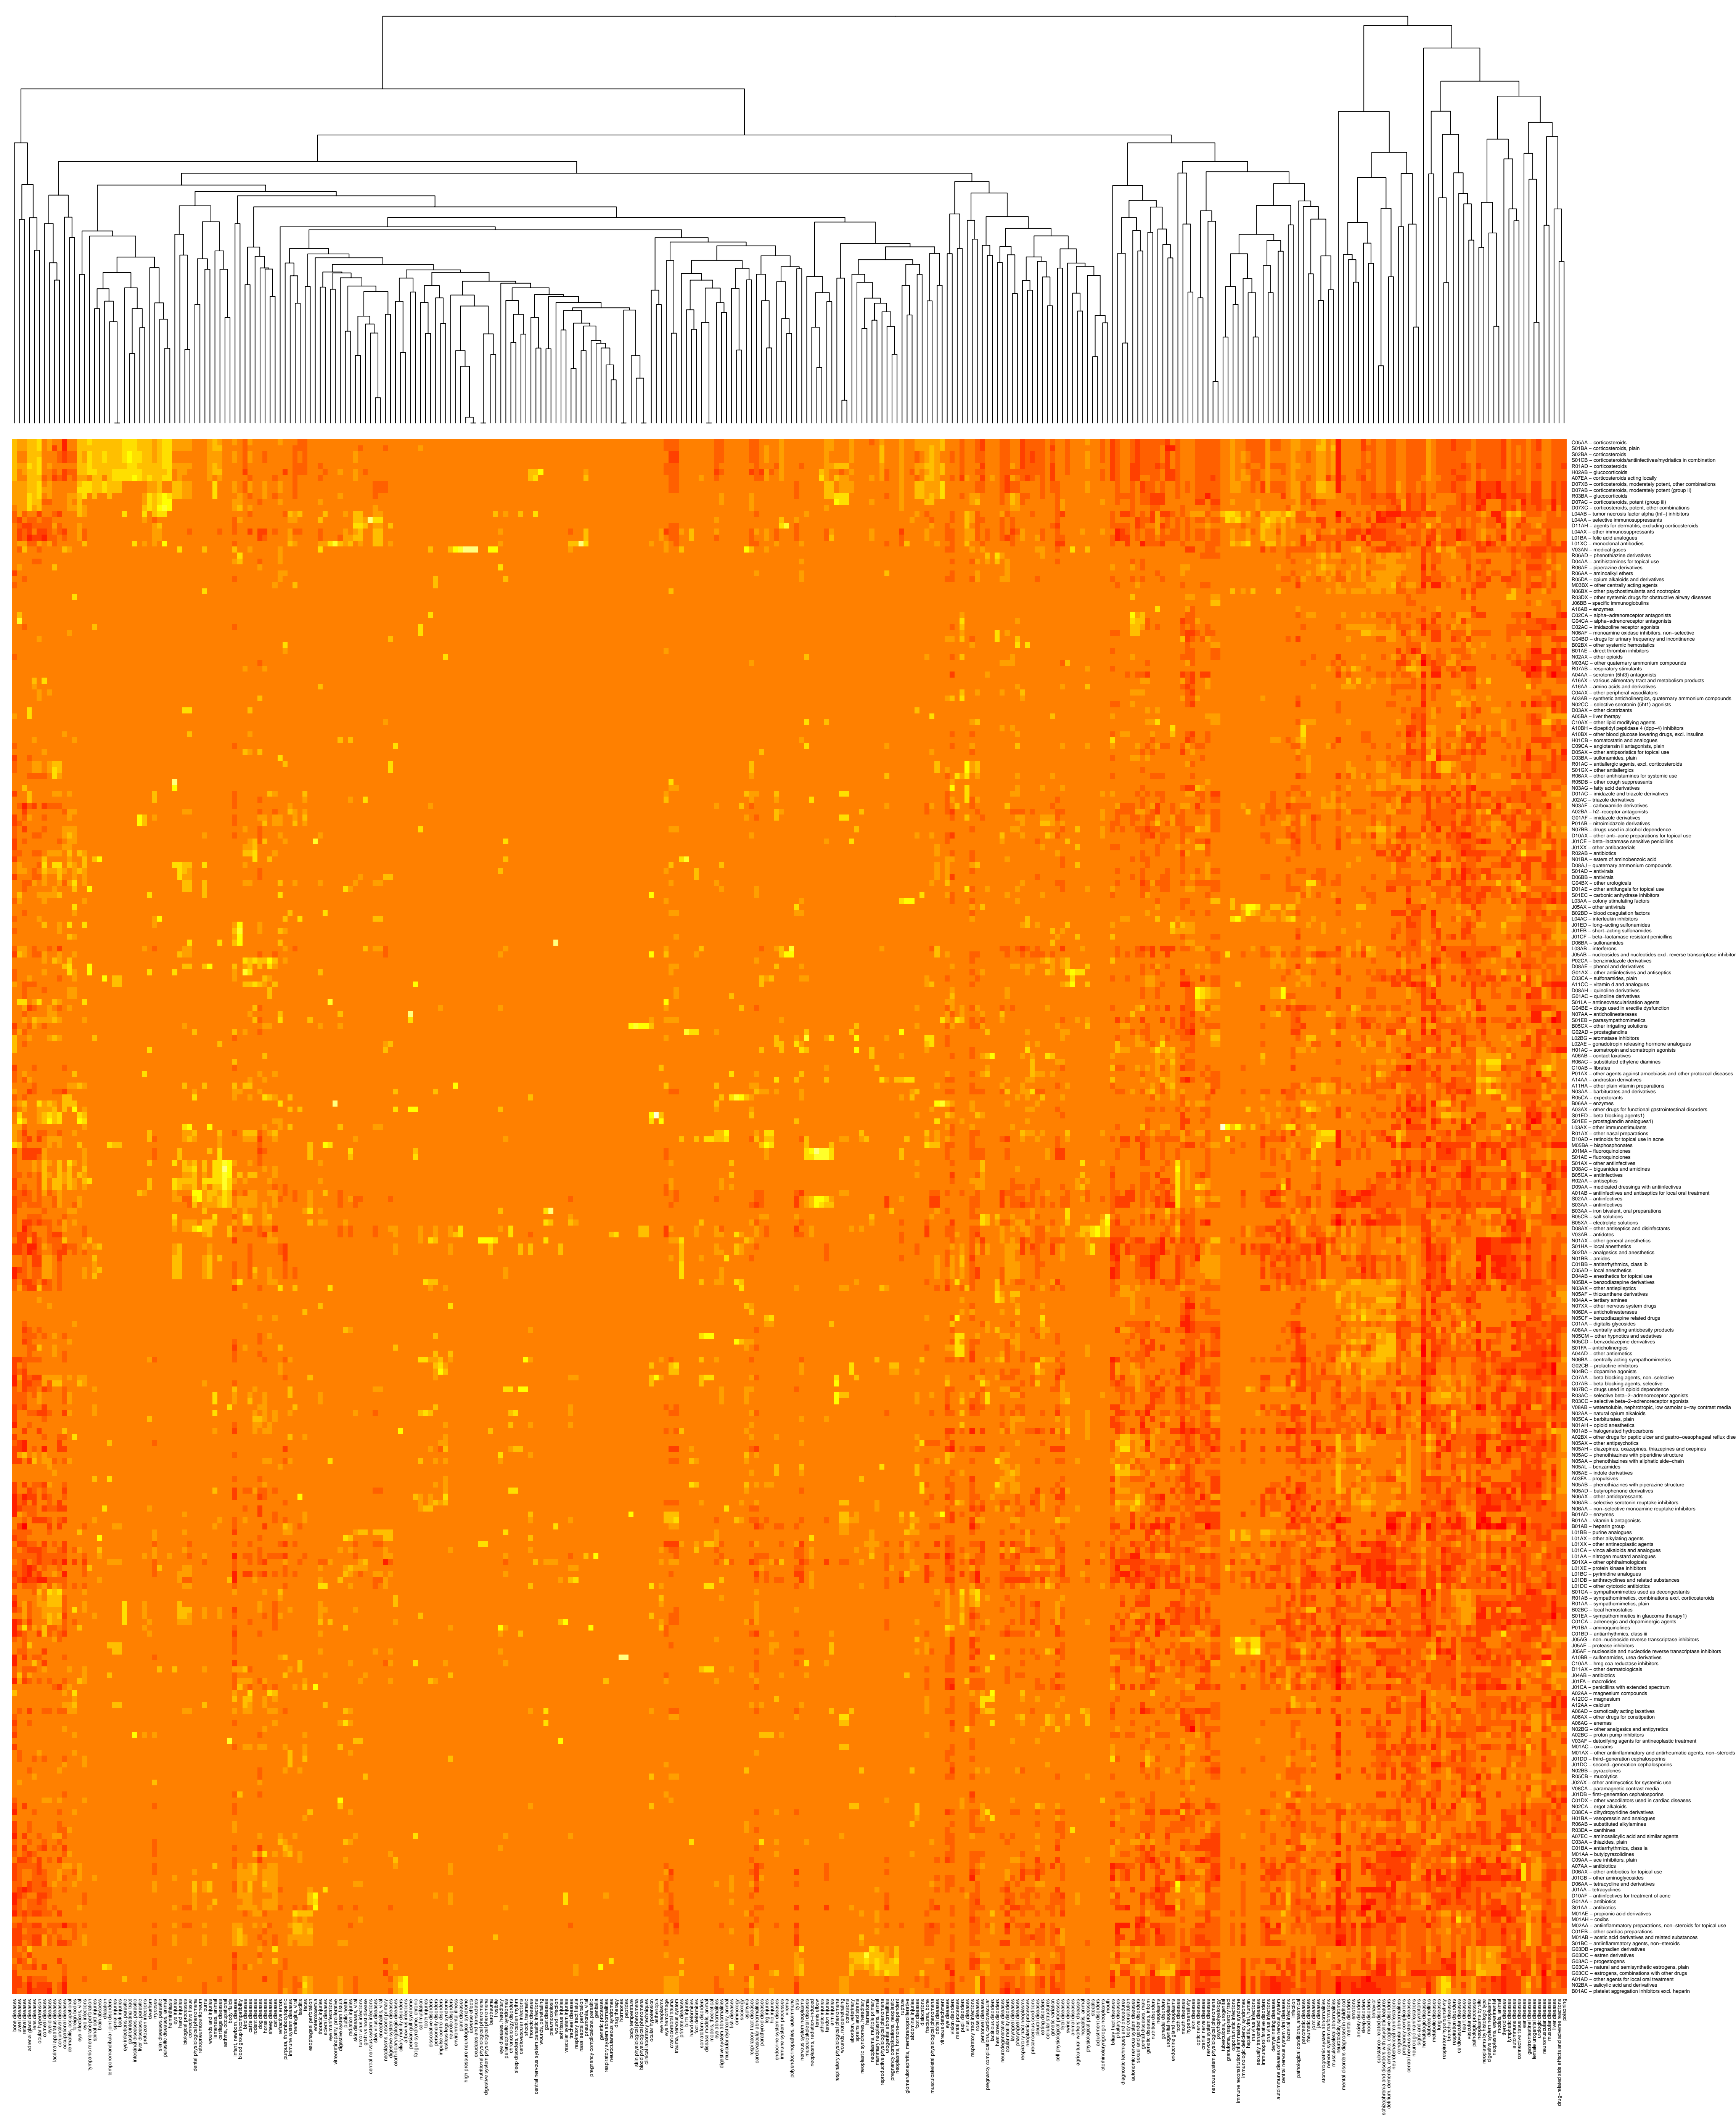

Fig. 2. Heat map of drug classes and ADE classes(based on the class signals)

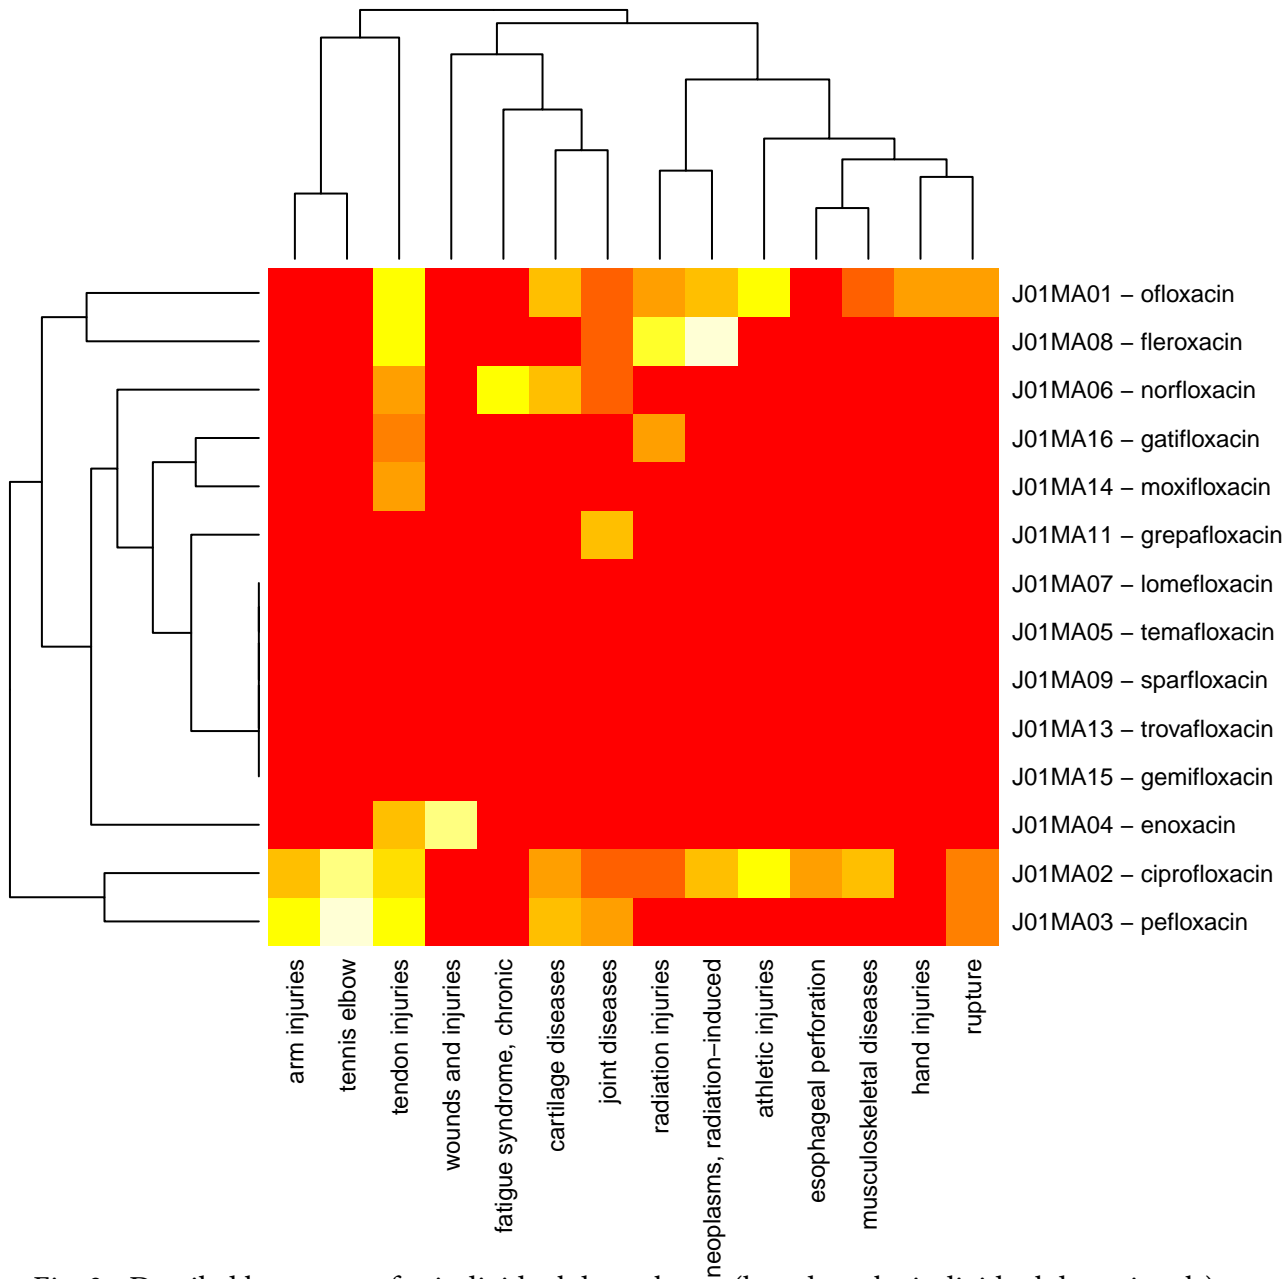

Fig. 3. Detailed heap maps for individual drug classes (based on the individual drug signals) Fluoroquinolones, ADE classes and drugs

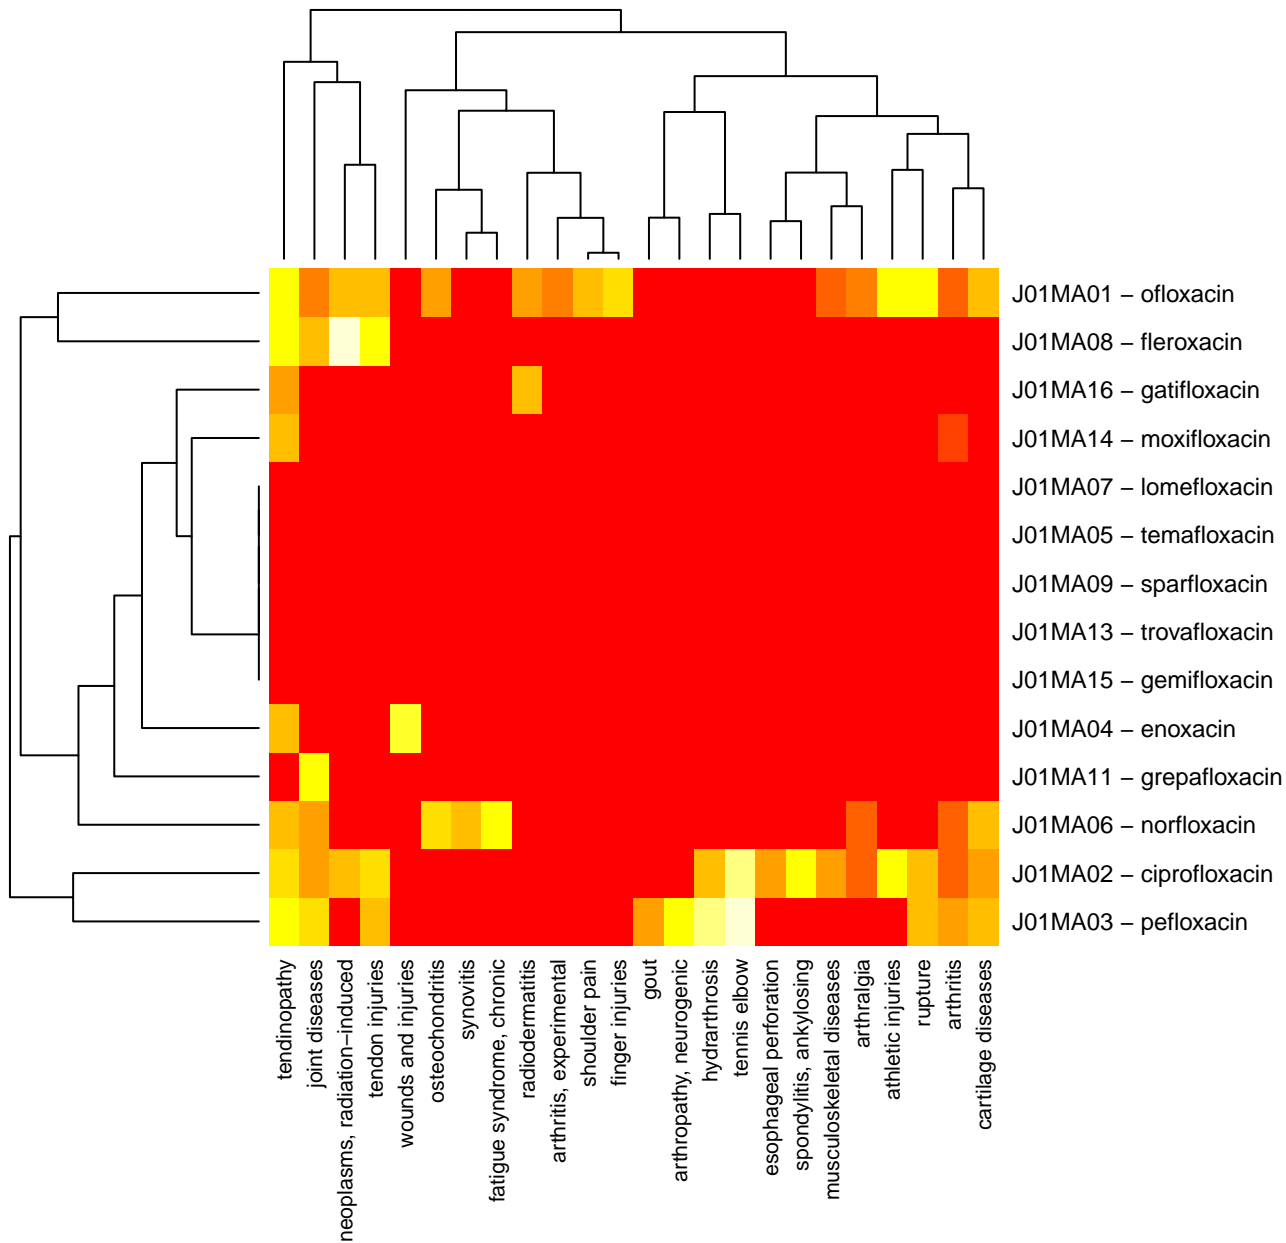

Fig. 3. Detailed heap maps for individual drug classes (based on the individual drug signals)  
Fluoroquinolones, ADEs and drugs

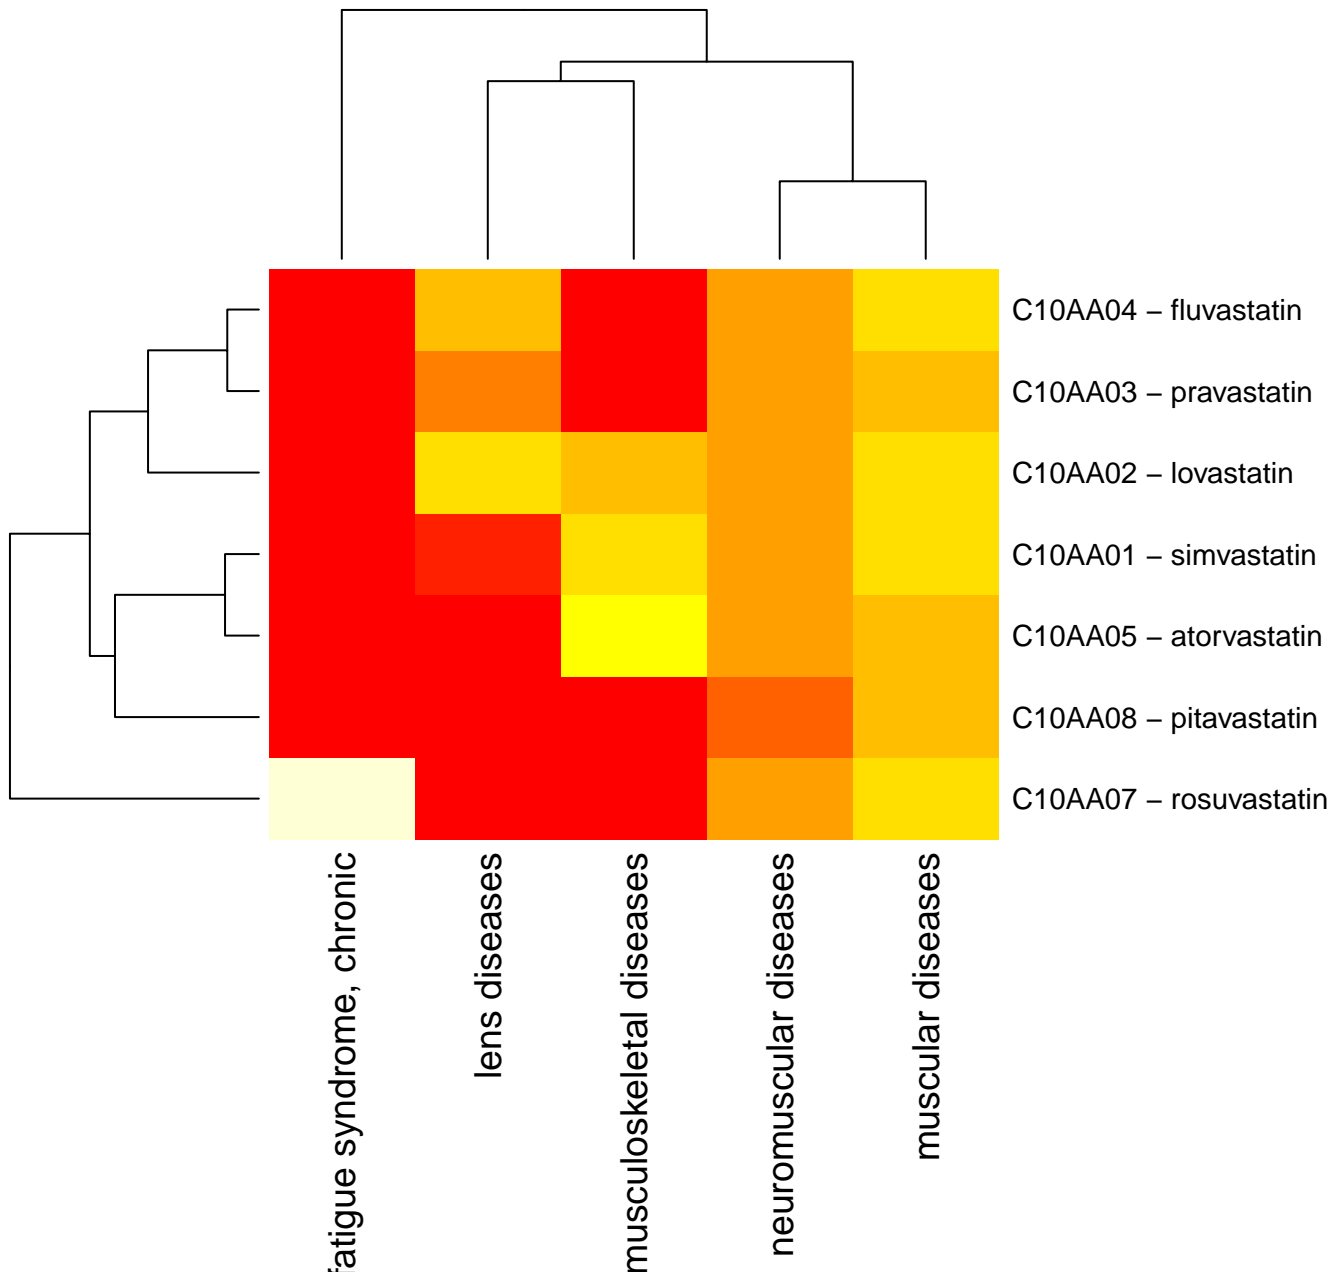

Fig. 3. Detailed heap maps for individual drug classes (based on the individual drug signals)  
 Statins, ADE classes and drugs

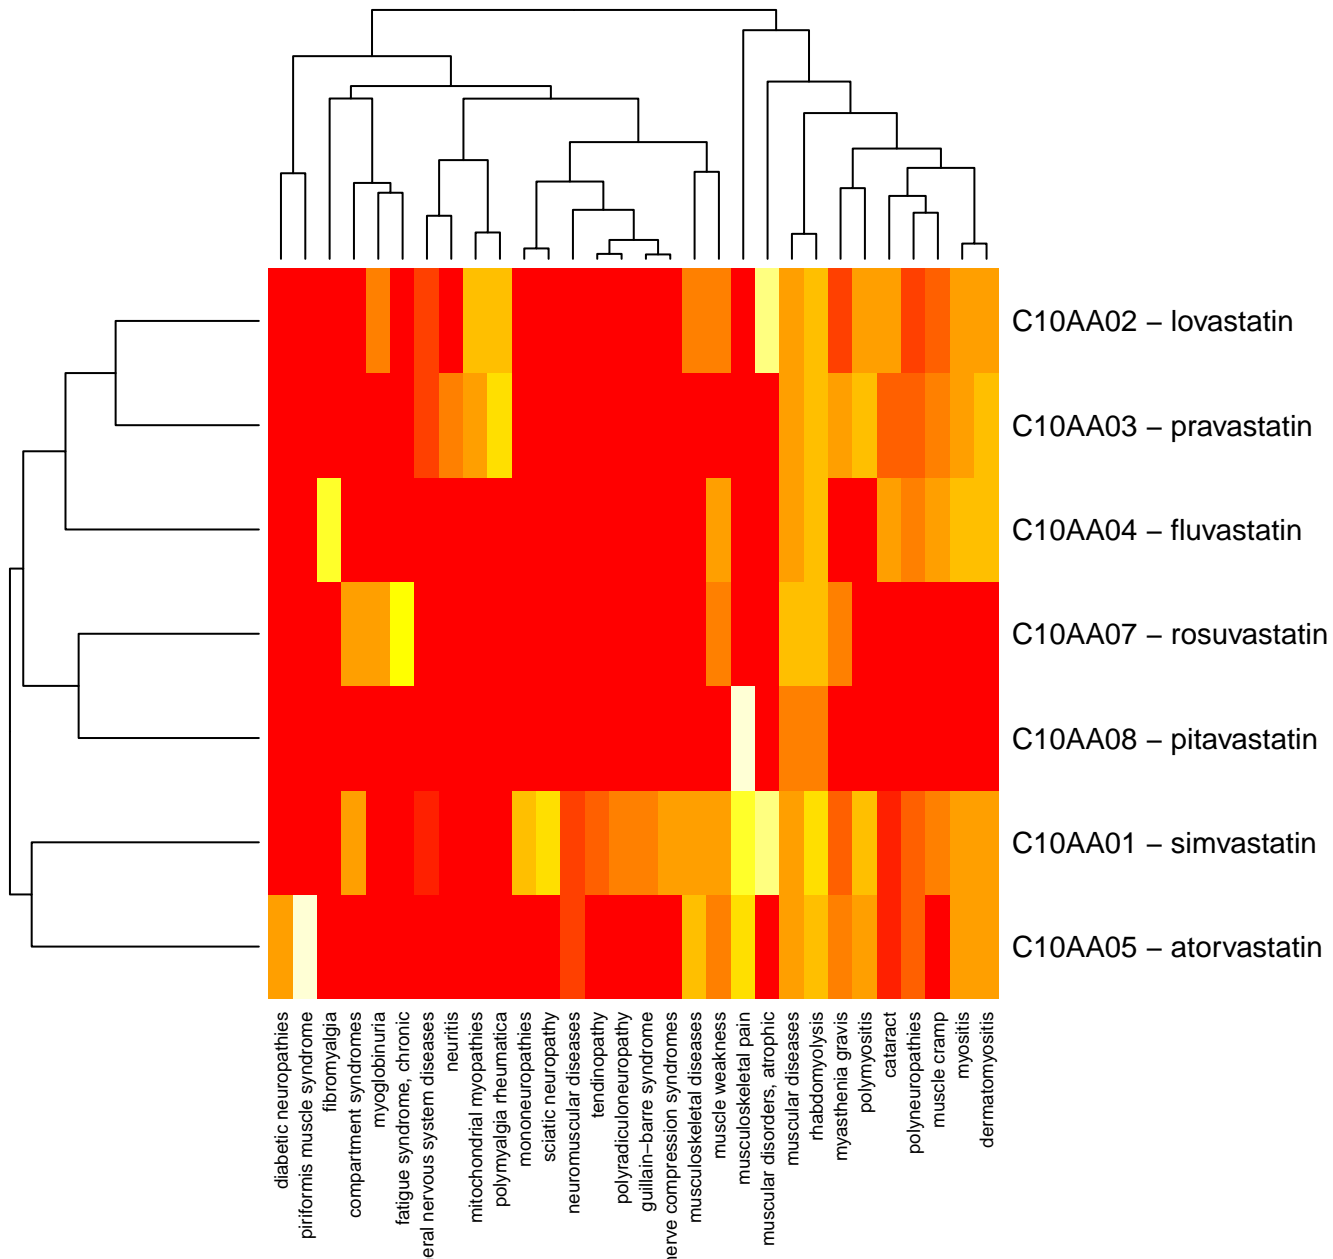

Fig. 3. Detailed heap maps for individual drug classes (based on the individual drug signals)  
 Statins, ADEs and drugs
